# Supplementary material
Source: HighWire-hosted journal article supplement (https://www.cmajopen.ca/highwire/filestream/89363/field_highwire_adjunct_files/1/open-2021-0170-original-submission.pdf)

1  
2  
3 Hypertension Identification Using Inpatient Electronic Medical Record Clinical Notes: An  
4 Explainable Data-Driven Algorithm Study  
5  
6

7 Elliot A. Martin PhD<sup>1,2</sup>, email: [eamartin@ucalgary.ca](mailto:eamartin@ucalgary.ca)  
8  
9

10 Adam G. D'Souza PhD<sup>1,2</sup>, email: [adsouza@ucalgary.ca](mailto:adsouza@ucalgary.ca)  
11

12 Seungwon Lee MPH<sup>1,2</sup>, email: [seungwon.lee@ucalgary.ca](mailto:seungwon.lee@ucalgary.ca)  
13

14 Chelsea Doktorchik MSc<sup>1,3</sup>, email: [ctadokto@ucalgary.ca](mailto:ctadokto@ucalgary.ca)  
15

16 Cathy A. Eastwood PhD<sup>1,3</sup>, email: [caeastwo@ucalgary.ca](mailto:caeastwo@ucalgary.ca)  
17  
18

19 Hude Quan MD PhD<sup>1,3</sup>, email: [hquan@ucalgary.ca](mailto:hquan@ucalgary.ca)  
20  
21

- 22  
23  
24 1. Centre for Health Informatics, Cumming School of Medicine, University of Calgary,  
25 Calgary, Alberta, Canada  
26  
27 2. Alberta Health Services, Calgary, Alberta, Canada  
28  
29 3. Department of Community Health Science, Cumming School of Medicine, University of  
30 Calgary, Calgary, Alberta, Canada  
31  
32  
33  
34  
35

36 All authors can be reached at:  
37 Centre for Health Informatics  
38 Cumming School of Medicine  
39 University of Calgary  
40 TRW Building, 3280 Hospital Drive NW  
41 Calgary, Alberta, T2N 4Z6  
42 Canada  
43  
44

45 Correspondence should be addressed to Dr. Elliot Martin at the above address, or  
46  
47

48 Telephone: (403) 220-2779  
49 Fax: (403) 210-9744  
50 Email: [eamartin@ucalgary.ca](mailto:eamartin@ucalgary.ca)  
51  
52  
53  
54  
55  
56  
57  
58  
59  
60

1  
2  
3 **Key Words:** Electronic medical records, case identification, machine learning, natural language  
4 processing, hypertension  
5

## 6 **ABSTRACT**

7  
8  
9 **Background:** Case identification in inpatient environments is important for measuring health  
10 system performance and risk adjustment. The gold standard for case identification is chart  
11 review, which is costly and time consuming. Currently coded administrative data is used to  
12 capture conditions. Electronic Medical Records (EMR) can potentially be a superior rich data  
13 source for case identification compared to administrative data. Using machine learning, we  
14 developed an EMR-based hypertension case definition.  
15  
16  
17  
18  
19  
20  
21  
22

23 **Methods:** Chart review for inpatients was performed to identify documented hypertension  
24 status. Clinical notes in EMR were analyzed using natural language processing to extract their  
25 Unified Medical Language System concepts. The most important concepts and document-  
26 concept pairs were identified using machine learning. These were used to fit additional machine  
27 learning models, and to motivate a simpler concept search case identification algorithm. We  
28 compared EMR models against the commonly applied method of identifying cases using the  
29 International Classification of Diseases Tenth Revision codes abstracted from charts. The  
30 machine learning models were interpreted using Shapley Additive Explanations.  
31  
32  
33  
34  
35  
36  
37  
38  
39  
40  
41

42 **Results:** Of our study sample (n=3040), 48.5% were hypertensive. Our final EMR-based models  
43 had higher sensitivity compared to ICD codes alone, >90% vs 47%, while maintaining high PPV,  
44 >90% vs 97%. Hypertension was best documented in nursing notes, which are not generally used  
45 in administrative data coding.  
46  
47  
48  
49  
50

51 **Interpretation:** Our work demonstrates that hypertension tends to have clear documentation in  
52 EMR and is well classified by simple concept search on free text. Machine learning can provide  
53 insights into EMR documentation and can suggest simpler methods to implement.  
54  
55  
56  
57  
58  
59  
60

## INTRODUCTION

Condition identification is an essential part of a learning health system [1], monitoring health system performance, and risk adjustment. The gold standard for case identification is chart review, requiring trained clinicians to read each patient chart. This requires a substantial time commitment from well paid professionals -- often making it infeasible for population level research. To overcome this, coded administrative data is used to identify conditions.

Hospitalization rates for treatable conditions have been used as an indicator of appropriate primary care [3]. Hypertension is an example of an ambulatory care-sensitive condition. A lower hypertension hospitalization rate often indicates better access to primary care, or better quality of primary care services. However, it is often debated whether the hypertension hospitalization rate could be related to either true quality of care, data quality, or both. Accurate detection of hypertension in inpatient databases is therefore necessary when measuring health care performance.

Administrative health databases have been widely used to report hypertension hospitalization rates in many countries, because the data are routinely collected and cover wide geographic areas. After discharge, conditions are coded using the International Classification of Diseases (ICD). Canada uses ICD 10<sup>th</sup> Revision, Canadian Modification (ICD-10-CA). Unfortunately, hypertension is under-coded in ICD data, which can cast doubt on conclusions made when using administrative data to identify conditions and measure healthcare performance. Quan et al.[2] validated ICD hypertension data and reported a sensitivity of 68.3%, a positive predictive value (PPV) of 93.1%, a specificity of 97.8%, and a negative predictive value (NPV) of 87.7%. The

1  
2  
3 observed under-coding of hypertension can potentially be attributed to coders having limited  
4 time (20-30 minutes in Canada) to abstract one chart and are therefore focused on identifying  
5 severe or main conditions, as mandated by reporting requirements [4,5].  
6  
7  
8  
9

10  
11  
12 Adopting EMRs to collect health information is a promising opportunity to improve the accuracy  
13 of identifying hypertension. However, methods for EMR-based hypertension identification are  
14 needed. Clinical notes are a rich source of information in EMRs, but are underutilized in  
15 automated processes like Machine Learning (ML) due to the difficulties in extracting  
16 information from them. The Unified Medical Language System (UMLS)[6] attempts to  
17 overcome some of these difficulties by mapping the varying lexical choices available in clinical  
18 documentation to a single Concept Unique Identifier (CUI). We believe CUIs can play an  
19 important role in creating interpretable models. Based on this concept, this study aimed to  
20 develop a hypertension case identification method using EMR inpatient clinical notes.  
21  
22  
23  
24  
25  
26  
27  
28  
29  
30  
31  
32  
33

## 34 **METHODS**

### 35 **Design**

36  
37  
38 This is an EMR data-driven rule-based algorithm study design.  
39  
40  
41  
42  
43  
44

### 45 **Setting and Participants**

46  
47 Our study cohort consisted of a random sample of 3,040 patients. We calculated that 3000  
48 records are required to test the 10% difference in sensitivity of common comorbidities, such as  
49 hypertension (30.2%).  
50  
51  
52  
53  
54  
55  
56  
57  
58  
59  
60

1  
2  
3 The patients were at least 18 years of age and were admitted to one of three acute care facilities  
4 in Calgary, Canada between January 1 and June 30, 2015. For patients with multiple admissions,  
5  
6 one admission within the study period was randomly selected.  
7  
8  
9

## 10 11 12 13 14 **Data Sources**

### 15 **Sunrise Clinical Manager™ (SCM)**

16  
17 Sunrise Clinical Manager™ (SCM)  
18  
19 AllScripts SCM is a city-wide, population-level EMR system currently in operation throughout  
20  
21 all acute care facilities in Calgary, Canada. Alberta Health Services, the single health authority in  
22  
23 Alberta, manages SCM and the associated electronic data warehouse [7].  
24  
25  
26  
27

### 28 **Discharge Abstract Database (DAD)**

29  
30 The DAD is the administrative health database where diagnosis codes for all inpatient encounters  
31  
32 are stored using ICD-10-CA [8]. The diagnosis codes are assigned by coders after discharge,  
33  
34 based on the clinical documentation in patients charts. The database also contains basic  
35  
36 demographic information about the patients (e.g., sex and age). The Canadian Institute for Health  
37  
38 Information provides national coding standards and training programs for health information  
39  
40 managers (i.e. coders) [9].  
41  
42  
43  
44  
45  
46

### 47 **Medical Chart Review**

48  
49 We extracted the patient charts for each of these admissions from the hospital records  
50  
51 departments [10]. Nurse reviewers looked for a listed diagnosis of hypertension in patients'  
52  
53 History & Physical, Multidisciplinary Progress notes, Consult notes, and Discharge Summary. If  
54  
55  
56  
57  
58  
59

1  
2  
3 a diagnosis was documented, the chart was labeled as hypertension present. The inter-rater  
4 reliability between reviewers was high ( $>0.8$  kappa) [10]. We linked these three databases using  
5  
6 Personal Health Number (a unique lifetime identifier), chart number (a unique number associated  
7  
8 with a patient's admission), and admission date.  
9

### 14 15 **Defining Hypertension in DAD**

16  
17 In the DAD, hypertension was defined using the validated ICD-10 algorithm [8] through  
18  
19 searching 25 diagnosis coding fields for each admission.  
20

### 23 24 **Defining Hypertension in EMR following Case Identification Pipeline**

25  
26 We outline the steps from extracting the EMR data to our final hypertension case-identification  
27  
28 algorithms in Figure 1. The data was split into 80% training (n=2432) and 20% test (n=608). The  
29  
30 training set was used for training and validation of all the machine learning models, and the test  
31  
32 set was only used to compare the final EMR models with the ICD method.  
33  
34  
35  
36  
37

38 **Figure 1 Insert Here**

### 40 41 **Concept Extraction**

42  
43 We used the clinical Text Analysis and Knowledge Extraction System (cTAKES) [11], in  
44  
45 particular its default clinical pipeline, to process all the clinical notes. We extracted clinical  
46  
47 concepts in the form of CUIs from the UMLS. This method accounts for variation in terminology  
48  
49 among EMRs, because UMLS maps synonymous terms to the same underlying concept. For  
50  
51 example, in UMLS, the clinical concept "Hypertensive disease" is assigned the CUI  
52  
53 "C0020538". The 2018AB UMLS release contains 67 synonyms for this clinical concept,  
54  
55  
56  
57  
58  
59  
60

1  
2  
3 including “BLOOD PRESSURE HIGH”, “HBP”, “HTN”, “Hyperpiesia”, “Hypertension”, and  
4  
5 “systemic HTN”.  
6

7  
8 All these synonyms map to the same CUI, which allowed us to generate non-redundant (i.e.,  
9  
10 normalized) features. We used the negation and subject attribute annotators in cTAKES to label  
11  
12 each CUI. These assessed whether the concept appeared in a negated context, e.g., ‘no evidence  
13  
14 of hypertension’, and whether the subject to which the CUI was associated was the patient or  
15  
16 someone else. The cTAKES outputs were then converted into a document-concept matrix  
17  
18 containing the counts of each CUI for each document type (‘document’) and each chart. Only  
19  
20 CUIs that had the patient as their subject, and that cTAKES determined were non-negated, were  
21  
22 counted.  
23  
24  
25  
26  
27

## 28 Feature Selection

29  
30 Feature selection is the process of identifying the variables most relevant to the problem. Our  
31  
32 features included both the CUIs and the clinical notes that could discriminate hypertensive cases.  
33  
34 There were 58 types of clinical notes in our extracted EMR data, such as “Discharge Summary”  
35  
36 and “History and Physical”. We used these to create two different types of feature sets. The first  
37  
38 set of concept features contained only the number of times each concept occurred for each  
39  
40 patient; the second set of document-concept features contained the number of times each concept  
41  
42 appeared in a given document type. For example, the counts of history\_and\_physical-C0020538  
43  
44 and discharge\_summary\_medical-C0020538 would contribute to the same C0020538 feature in  
45  
46 the first set, and would be separate features in the second set. The first set of features could  
47  
48 illustrate the most reliable concepts used to identify hypertension, while the second could  
49  
50 illustrate the most high yield and trustworthy documents to look at for future chart review.  
51  
52  
53  
54  
55  
56  
57  
58  
59  
60

The relative importance of each feature for determining hypertension was estimated using the gradient boosted algorithm XGBoost [12]. First, 20% of the patients were put aside to test the final algorithms, with the remaining 80% used for training and validation. For each feature set, five XGBoost models were fit, each using 5-fold cross-validation optimizing for AUC (See Table 1 for grid search parameters). This was done to ensure that only reliable features were selected, and to exclude those that only performed well on a subset of the data. The most important features that occurred in all 5 models were selected. Gain was used as the measure of feature importance (i.e., the improvement in accuracy of classification attributable to a feature).

**Table 1. Grid search parameters for XGBoost models**

| Parameter                      | Document-type XGBoost Models |
|--------------------------------|------------------------------|
| Cross-validation folds         | 5                            |
| lambda (L2 regularization)     | 0, 0.5, 1                    |
| Alpha (L1 regularization)      | 0, 0.5, 1                    |
| Max depth                      | 5, 8                         |
| Min child weight               | 4, 8                         |
| N_estimators (number of trees) | 500, 1000                    |
| Subsample                      | 0.8                          |

### Final Models

Two final XGBoost models were fit using the selected features, one for each reduced feature set, again using the parameters in Table 1. Interpretability of our algorithms was a key study



1  
2  
3 objective. A new technique [13] was used to compute SHAP (SHapley Additive exPlanations)  
4 values [14] on trees. If a feature has a large positive SHAP value for a given patient, it would  
5 indicate that the feature makes a positive finding of hypertension much more likely, with a large  
6 negative SHAP value indicating the converse. Finally, we used these results to suggest a simpler  
7 concept search strategy for case identification, and provide insights for future chart review.  
8  
9  
10  
11  
12  
13  
14  
15  
16  
17  
18

### 19 **Ethics Approval**

20 Ethical approval for this study was obtained from the Conjoint Health Research Ethics Board at  
21 the University of Calgary (REB15-0790).  
22  
23  
24  
25  
26  
27  
28  
29

### 30 **RESULTS**

31 Cohort characteristics are presented in Table 2. Almost half of the cohort was hypertensive  
32 (48.5%).  
33  
34  
35  
36  
37  
38  
39

40 **Table 2: Characteristics of Study Sample**

| 43 <b>Variable</b>  | 44 <b>All<br/>(3040)</b> | 45 <b>Hypertensive<br/>(1474)</b> | 46 <b>Non-Hypertensive<br/>(1566)</b> |
|---------------------|--------------------------|-----------------------------------|---------------------------------------|
| 47 Median age (IQR) | 62 (48-76)               | 71 (61-82)                        | 52.5 (38-65)                          |
| 48 Female           | 1529 (50.3%)             | 710 (48.2%)                       | 819 (52.3%)                           |
| 49 Surgical Patient | 1102 (36.3%)             | 482 (32%)                         | 620 (39.6%)                           |

The performance of the initial Document-Concept and Concept models are shown in Table 3, where the models are compared using the same training and validation sets on different folds. It can be seen that concept models seemed too overfit on the training data, but have similar performance to the document-concept models on the validation data. All the models performed relatively well on the validation data, with sensitivities and PPVs close to 90% throughout.

To remove spurious features, we selected only those that were in the top 20 most important features across all folds, for both sets of models. We chose the top 20 as feature importance decayed rapidly for both sets of models, and thus captured the most relevant features. Ten document-concept and 8 concept features remained. These top features were then used to create new document-concept and concept models, again using the parameters from Table 1.

**Table 3:** Performance of initial XGBoost Document-Concept model (DC) models and Concept Models (C)

|                                        | Training Data*          |                 | Validation Data*        |                 |
|----------------------------------------|-------------------------|-----------------|-------------------------|-----------------|
| Model:<br>Document-<br>Concept/Concept | Sensitivity<br>(%) DC/C | PPV (%)<br>DC/C | Sensitivity<br>(%) DC/C | PPV (%)<br>DC/C |
| Fold 0                                 | 90/100                  | 93/100          | 89/89                   | 88/89           |
| Fold 1                                 | 85/100                  | 94/100          | 86/92                   | 94/93           |
| Fold 2                                 | 90/100                  | 94/100          | 87/91                   | 90/91           |
| Fold 3                                 | 90/100                  | 94/100          | 88/91                   | 92/92           |
| Fold 4                                 | 89/100                  | 94/100          | 91/94                   | 91/89           |

Note: \*Folds 0 and 1 have a Training n=1945 and Validation n=487, and Folds 2, 3, and 4 have Training n=1946 and Validation n=486

1  
2  
3  
4  
5 To examine how features impacted the classification of each patient in the training set, we show  
6 the relationship between feature values and SHAP values for the concept model in Figure 2, and  
7 the document-concept model in Figure 3, where a larger SHAP value means a higher likelihood  
8 of classifying the patient as hypertensive. Unsurprisingly, Figure 2 shows that the concept for  
9 hypertension, C0020538, is the most important feature in the concept model, and is the only  
10 feature whose absence results in a strong negative classification. In Figure 3, it can be seen that  
11 all but one of the features in the Document-Concept model involve C0020538, which amounts to  
12 a ranked set of documents to search for hypertension documentation, with the best document to  
13 search being “surgical\_assessment\_and\_history\_-\_nursing”. The predominance of the  
14 hypertension concept in determining hypertension status indicated that a simple concept search  
15 for C0020538 could also perform well, and would have the benefit of being simpler to  
16 implement.  
17  
18  
19  
20  
21  
22  
23  
24  
25  
26  
27  
28  
29  
30  
31  
32  
33  
34

35 **Figure 2 Insert Here**

36 **Figure 3 Insert Here**  
37  
38  
39  
40  
41

42 In Table 4, we show the results of the final ML models as well as the simpler concept search  
43 algorithm and the ICD-10 algorithm. We can see that the EMR algorithms have much higher  
44 sensitivities and NPVs compared to the ICD algorithm across all stratifications. This is offset by  
45 slightly worse PPVs, which are still above 90% for all groups except the youngest two age  
46 stratifications, where it drops as low as 82%. Interestingly the youngest age stratification is the  
47 only place where the ICD algorithm has a worse PPV than the EMR algorithms. The ICD  
48  
49  
50  
51  
52  
53  
54  
55  
56  
57  
58  
59  
60

algorithm also has a higher specificity than the EMR algorithms, which are still above 90% for all groups except the oldest age stratification, where they drop as low as 87%. In general, we see that the concept search algorithm has quite comparable performance to the ML algorithms, despite its simplicity.

**Table 4:** Stratified Validity Scores Across Population Characteristics for Classification Models Document-Concept model (DC)/Concept Model (C)/Concept Search (CS)/ICD

|                      | Sensitivity (%)<br>DC/C/CS/ICD | Specificity (%)<br>DC/C/CS/ICD | PPV (%)<br>DC/C/CS/ICD | NPV (%)<br>DC/C/CS/ICD |
|----------------------|--------------------------------|--------------------------------|------------------------|------------------------|
| <b>All N = 608</b>   | 95/91/95/47                    | 92/93/92/98                    | 91/93/92/97            | 95/91/95/66            |
| <b>By Age</b>        |                                |                                |                        |                        |
| < 45 (n=123)         | 100/100/100/29                 | 98/97/97/99                    | 88/82/82/80            | 100/100/100/92         |
| 45-64 (n=206)        | 87/90/90/42                    | 92/90/91/98                    | 87/84/85/94            | 92/93/94/74            |
| >64 (n=279)          | 91/96/97/50                    | 88/87/87/97                    | 95/95/95/98            | 79/89/90/42            |
| <b>By Service</b>    |                                |                                |                        |                        |
| Surgical (n=213)     | 90/91/91/44                    | 94/93/93/99                    | 92/90/90/98            | 92/93/93/70            |
| Non-Surgical (n=395) | 91/96/97/48                    | 93/91/92/98                    | 93/92/92/96            | 91/96/96/64            |
| <b>By Sex</b>        |                                |                                |                        |                        |
| Female (n=302)       | 90/94/94/45                    | 94/92/92/98                    | 92/91/91/95            | 92/95/95/68            |
| Male (n=306)         | 91/95/96/48                    | 93/91/92/99                    | 93/92/93/97            | 91/94/95/64            |

## INTERPRETATION

We examined how well hypertension could be identified in an inpatient population using UMLS concepts extracted from EMR clinical notes. We employed a data-driven approach to select

1  
2  
3 relevant concepts and document-concept pairs in an automated way, thereby minimizing the  
4 need for clinical input. Our methods could be used with a common data model such as  
5  
6 Observational Medical Outcomes Partnership (OMOP) [15,16]. OMOP makes use of a  
7  
8 NOTE\_NLP table where CUIs, their annotations, and their document types are referenced. Our  
9  
10 algorithms can be executed from these fields.  
11  
12  
13

14  
15  
16  
17 While XGBoost is a powerful model, the potentially large number of trees makes it hard to  
18  
19 determine how it arrives at a given classification. Therefore, we employed SHAP values to  
20  
21 assess the impact of each feature on classification. They showed that the classification was  
22  
23 dominated by the hypertension concept C0020538, which motivated us to try a simple concept  
24  
25 search algorithm.  
26  
27

28  
29  
30  
31 The simple concept search has comparable performance to the ML algorithms, and is the  
32  
33 approach we recommend due to its simplicity. The concept ML algorithm did identify the  
34  
35 hypertensive medication amlodipine (C0051696) as the second most relevant feature, but when  
36  
37 the concept algorithm (C) was compared to the concept search algorithm (CS) in Table 4, it did  
38  
39 not reliably improve classification. This indicates that medications do not robustly indicate  
40  
41 hypertension status.  
42  
43

44  
45  
46  
47 Our EMR-based method also provides insight into the underlying EMR data documentation. Our  
48  
49 document-concept algorithm indicates that hypertension was documented most reliably in  
50  
51 “Surgical Assessment and History - Nursing” followed by “Nursing Transfer Report -  
52  
53 Emergency Department to Inpatient”. Canadian coders are not required to review these nursing  
54  
55  
56  
57  
58  
59  
60

1  
2  
3 documents and only review physician documentation [17]. In hospitals, nurses check patient  
4 blood pressures and document it in nursing notes, and they also collect patients' daily clinical  
5 information. Thus, our EMR-based method could be automated, which can avoid potential bias  
6 associated with coding guidelines and practice [18]. This has the potential to improve ICD  
7 databases with minimal cost.  
8  
9  
10  
11  
12  
13  
14  
15  
16

17 Our study demonstrates EMR-based methods have higher sensitivity than the ICD-based method.  
18 This could result from coding practices in ICD data. Coders review charts to code hypertension.  
19 For many inpatients, hypertension as a comorbidity to the main condition does not contribute to  
20 hospital length of stay and clinical outcomes significantly. Coders are not mandatorily asked to  
21 code these secondary diagnoses, including hypertension. However, our EMR-based method  
22 searches clinical notes regardless of the contribution of hypertension to clinical care. It also  
23 captures documented hypertension efficiently, and may be a potential solution to improve DAD  
24 quality.  
25  
26  
27  
28  
29  
30  
31  
32  
33  
34  
35  
36  
37

38 The presented EMR methods have various applications in clinical and research contexts, namely  
39 health system performance evaluation. While hypertension is most often diagnosed in a primary  
40 care setting, patients are admitted to hospital when the severity of the condition worsens.  
41 Therefore, identifying hypertension in an inpatient setting, without relying on primary care data,  
42 is essential for health system performance assessment. The ML approach presented in the current  
43 study can also be applied to identifying other conditions in inpatient EMR data, which may not  
44 have as straightforward documentation.  
45  
46  
47  
48  
49  
50  
51  
52  
53  
54  
55  
56  
57  
58  
59  
60

## Limitations

We used inpatient documentation only, and are aware that hypertension is largely managed in outpatient settings. However, our study was aimed at developing EMR-based hypertension case identification in order to overcome under-coding issues in ICD databases. Of note, our methods performed comparably to state-of-the-art work using outpatient data [19].

Our reference standard identified cases based on clinician documentations and did not re-diagnose hypertension based on charts. It is challenging to follow hypertension diagnosis guidelines, because charts do not contain detailed information. Clinicians document diagnoses rather than supporting information. Although blood pressures are part of diagnoses, its criteria can vary across countries, including cut-off values for blood pressure to define hypertension [20,21]. Therefore, clinical rule-based algorithms may not be as robust when performing case identification in other contexts. Finally, we have not conducted external validation of our algorithm using data from other jurisdictions. This type of external validation study between multiple systems may be feasible using common data models, such as OMOP [15,16].

## Conclusion

We have leveraged EMR clinical notes to create a data driven case identification pipeline for inpatients. We utilized ML models to identify the most relevant concepts and documents to examine in the EMR, and used those insights to create a simpler concept search case identification algorithm. This algorithm has great potential to improve hospital discharge abstract administrative data quality, and also to provide a tool to measure hypertension hospitalization

1  
2  
3 rates for system performance evaluation. The ML models also provide insights into EMR  
4  
5 documentation for future research, fulfilling the iterative feedback goal of a learning health  
6  
7 system.  
8  
9

## 10 11 12 13 14 15 **LIST OF ABBREVIATIONS**

16  
17  
18 AUC: Area Under the receiver operating characteristic Curve

19  
20 CART: Classification and Regression Trees

21  
22 cTAKES: clinical Text Analysis and Knowledge Extraction System

23  
24 CUI: Concept Unique Identifier

25  
26 DAD: Discharge Abstract Database

27  
28 EMR: Electronic Medical Record

29  
30 ICD: International Classification of Diseases

31  
32 ML: Machine Learning

33  
34 NPV: Negative Predictive Value

35  
36 PPV: Positive Predictive Value

37  
38 SCM: Sunrise Clinical Manager

39  
40 SHAP: SHapley Additive exPlanations

41  
42 UMLS: Unified Medical Language System

## 43 44 45 46 47 48 49 50 **Consent for publication**

51  
52 Not applicable.  
53  
54  
55  
56  
57  
58  
59  
60



## Data Sharing

The datasets analysed during the current study are not publicly available due to the potential for identifying information to be exposed in the clinical notes. Working with the data is possible through collaboration with the Centre for Health Informatics and Alberta Health Services.

The python code used to perform this analysis can be found at the github repository <https://github.com/centre-for-health-informatics/Hypertension-Case-Identification>, DOI 10.5281/zenodo.4543942, under an open MIT license.

## Competing interests

The authors declare that they have no competing interests.

## Funding

This work was supported by a Canadian Institutes for Health Research, Operating Project Grant 201809PJT-409935-HS1-CBBA-114817.

## Authors' contributions

E.M. performed the majority of the analysis and writing. A.D. assisted with the analysis and writing. S.L. and C.D. provided subject matter expertise and assisted with writing. C.E. and H.Q. were responsible for study design and assisted in the writing.

## Acknowledgements

The authors would like to thank Yuan Xu and Sang Min Lee for their helpful comments on the manuscript.

## REFERENCES

1. Friedman CP, Wong AK, Blumenthal D. Achieving a nationwide learning health system. *Science translational medicine*. 2010;2(57):57cm29.
2. Quan H, Li B, Saunders LD, et al. Assessing validity of ICD-9-CM and ICD-10 administrative data in recording clinical conditions in a unique dually coded database. *Health services research*. 2008;43(4):1424-1441.
3. Nyweide DJ, Weeks WB, Gottlieb DJ, Casalino LP, Fisher ES. Relationship of primary care physicians' patient caseload with measurement of quality and cost performance. *Jama*. 2009;302(22):2444-2450.
4. Lucyk K, Tang K, Quan H. Barriers to data quality resulting from the process of coding health information to administrative data: a qualitative study. *BMC health services research*. 2017;17(1):766.
5. Tang KL, Lucyk K, Quan H. Coder perspectives on physician-related barriers to producing high-quality administrative data: a qualitative study. *CMAJ open*. 2017;5(3):E617-e622.
6. Bodenreider O. The Unified Medical Language System (UMLS): integrating biomedical terminology. *Nucleic acids research*. 2004;32(Database issue):D267-270.
7. Lee S, Xu Y, D'Souza A, et al. Unlocking the Potential of Electronic Health Records for Health Research. *International Journal of Population Data Science*. 2020;5(1).
8. Quan H, Sundararajan V, Halfon P, et al. Coding algorithms for defining comorbidities in ICD-9-CM and ICD-10 administrative data. *Medical care*. 2005;43(11):1130-1139.
9. Quan H, Smith M, Bartlett-Esquilant G, Johansen H, Tu K, Lix L. Mining administrative health databases to advance medical science: geographical considerations and untapped potential in Canada. *The Canadian journal of cardiology*. 2012;28(2):152-154.
10. Eastwood, CA, Southern, DA, Khair, S, et al. The ICD-11 Field Trial: Creating a Large Dually Coded Database, 13 May 2021, PREPRINT (Version 1) available at Research Square [<https://doi.org/10.21203/rs.3.rs-505934/v1>]
11. Savova GK, Masanz JJ, Ogren PV, et al. Mayo clinical Text Analysis and Knowledge Extraction System (cTAKES): architecture, component evaluation and applications. *Journal of the American Medical Informatics Association: JAMIA*. 2010;17(5):507-513.
12. Chen T, Guestrin C. XGBoost: A Scalable Tree Boosting System. Proceedings of the 22nd ACM SIGKDD International Conference on Knowledge Discovery and Data Mining; 2016; San Francisco, California, USA.
13. Lundberg SM, Erion G, Chen H, et al. From Local Explanations to Global Understanding with Explainable AI for Trees. *Nat Mach Intell*. 2020;2(1):56-67.
14. Lundberg SM, Lee S-I. A unified approach to interpreting model predictions. Proceedings of the 31st International Conference on Neural Information Processing Systems; 2017; Long Beach, California, USA.
15. Hripcsak G, Duke JD, Shah NH, et al. Observational Health Data Sciences and Informatics (OHDSI): Opportunities for Observational Researchers. *Studies in health technology and informatics*. 2015;216:574-578.
16. Overhage J, Ryan P, Reich C, Hartzema A, Stang P. Validation of a common data model for active safety surveillance research. *Journal of the American Medical Informatics Association : JAMIA*. 2012;19(1):54-60.

17. Information CIH. Canadian coding standards for version 2018 ICD-10-CA and CCI. In: CIHI Ottawa, ON; 2018.
18. Saposnik G, Redelmeier D, Ruff CC, Tobler PN. Cognitive biases associated with medical decisions: a systematic review. *BMC medical informatics and decision making*. 2016;16(1):138.
19. Teixeira PL, Wei WQ, Cronin RM, et al. Evaluating electronic health record data sources and algorithmic approaches to identify hypertensive individuals. *Journal of the American Medical Informatics Association : JAMIA*. 2017;24(1):162-171.
20. Garies S, Hao S, McBrien K, et al. Prevalence of Hypertension, Treatment, and Blood Pressure Targets in Canada Associated With the 2017 American College of Cardiology and American Heart Association Blood Pressure Guidelines. *JAMA network open*. 2019;2(3):e190406.
21. Khera R, Lu Y, Lu J, et al. Impact of 2017 ACC/AHA guidelines on prevalence of hypertension and eligibility for antihypertensive treatment in United States and China: nationally representative cross sectional study. *BMJ (Clinical research ed)*. 2018;362:k2357.

Confidential

1  
2  
3 **Figure 1.** Case identification pipeline flow chart.  
4

5 We randomly sampled 3040 inpatient charts from SCM and extracted their associated clinical  
6 notes, identifying UMLS concepts with cTAKES. XGBoost models were used to separately  
7 select the most important concept and document-concept pair features. The selected features  
8 were used to fit reduced concept and document-concept XGBoost models. The concept features  
9 were also used to implement a simple search algorithm for the hypertension concept C0020538.  
10  
11  
12  
13  
14  
15  
16  
17

18 **Figure 2.** SHAP values for final Concept Model  
19

20 The SHAP values for each patient in the training set (n=2432) by model feature. Each dot  
21 represents a patient, with the SHAP value on the x-axis, and feature value given by its color. The  
22 higher the SHAP value the more likely the patient will be classified as hypertensive. The  
23 hypertension concept C0020538 is the most predictive feature, and the only one where a low  
24 count results in a significant likelihood of the patient not being classified as hypertensive.  
25  
26  
27  
28  
29  
30  
31  
32  
33

34 **Figure 3.** SHAP values for final Document-Concept Model  
35

36 The SHAP values for each patient in the training set (n=2432) by model feature. Each dot  
37 represents a patient, with the SHAP value on the x-axis, and feature value given by its color. The  
38 higher the SHAP value the more likely the patient will be classified as hypertensive. All the  
39 features represent different places to search for the hypertension concept C0020538, except the  
40 second to last important which looks for the amlodipine concept (C0051696) in the “Discharge  
41 Summary - Medical” document.  
42  
43  
44  
45  
46  
47  
48  
49  
50  
51  
52  
53  
54  
55  
56  
57  
58  
59  
60

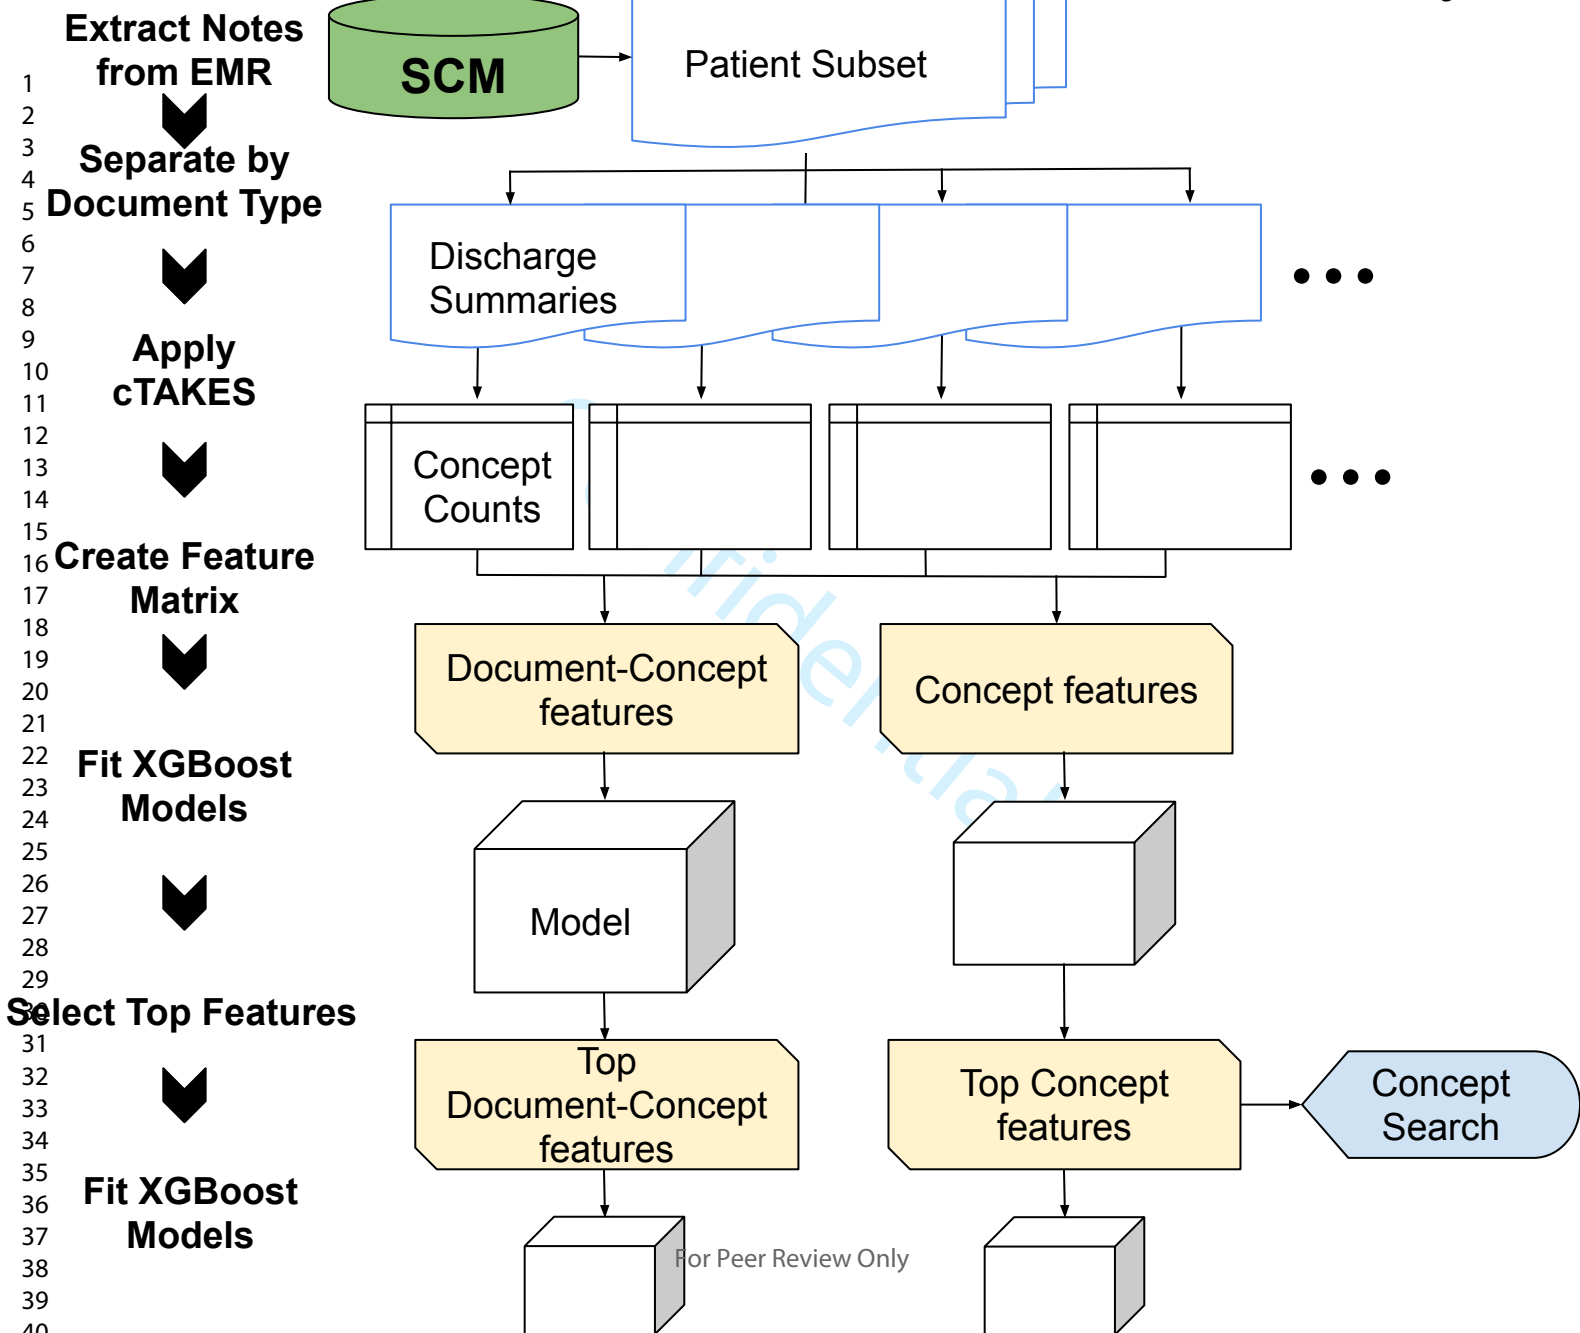

### Concept Model

C0020538  
2  
C0051696  
4  
C0242339  
5  
C0020261  
7  
C1384666  
9  
C0216784  
10  
C0678178  
11  
C0288171  
12  
13  
14  
15  
16  
17  
18  
19  
20  
21  
22  
23

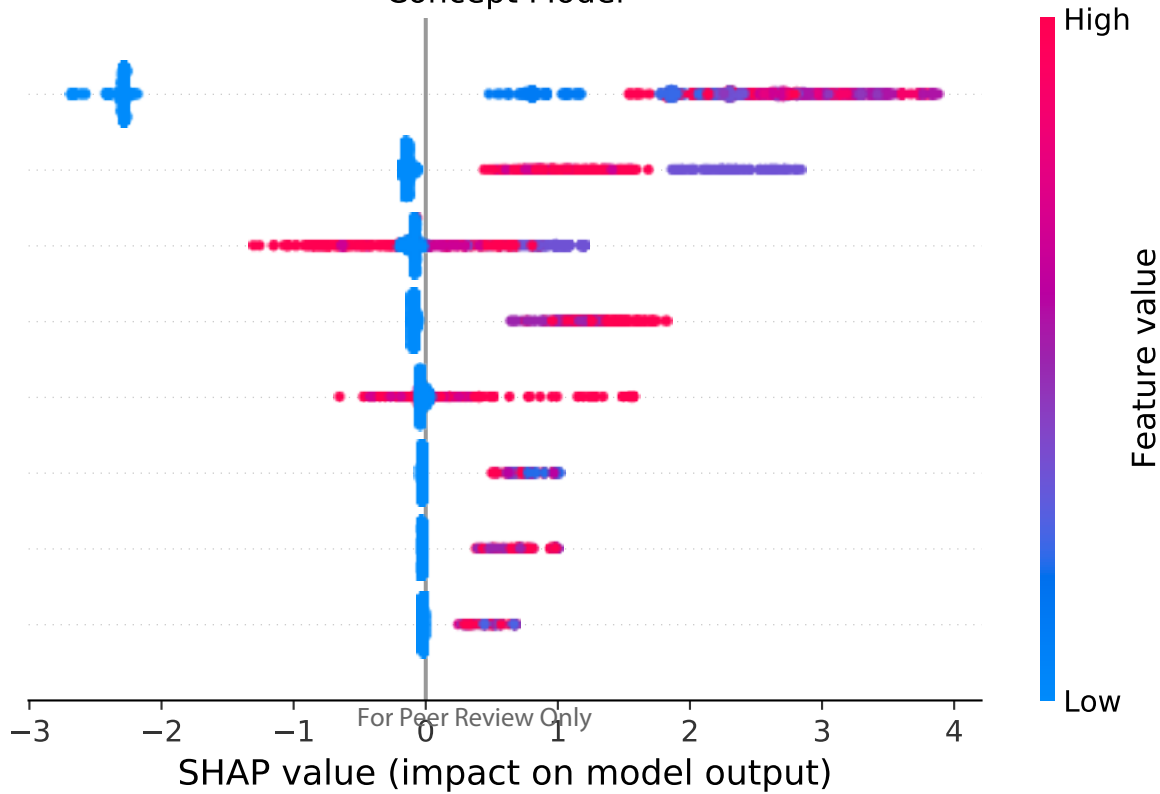

- 1 surgical\_assessment\_and\_history\_-\_nursing-C0020538
- 2
- 3 nursing\_transfer\_report\_-\_ed\_to\_ip-C0020538
- 4
- 5 discharge\_summary\_-\_medical-C0020538
- 6
- 7 nursing\_transfer\_report\_-\_pacu\_to\_ip-C0020538
- 8
- 9
- 10 adult\_triage\_note-C0020538
- 11
- 12 pharmacy\_care\_plan-C0020538
- 13
- 14 mpr-C0020538
- 15
- 16 history\_and\_physical-C0020538
- 17
- 18 discharge\_summary\_-\_medical-C0051696
- 19
- 20 discharge\_summary-C0020538
- 21
- 22
- 23
- 24
- 25
- 26
- 27

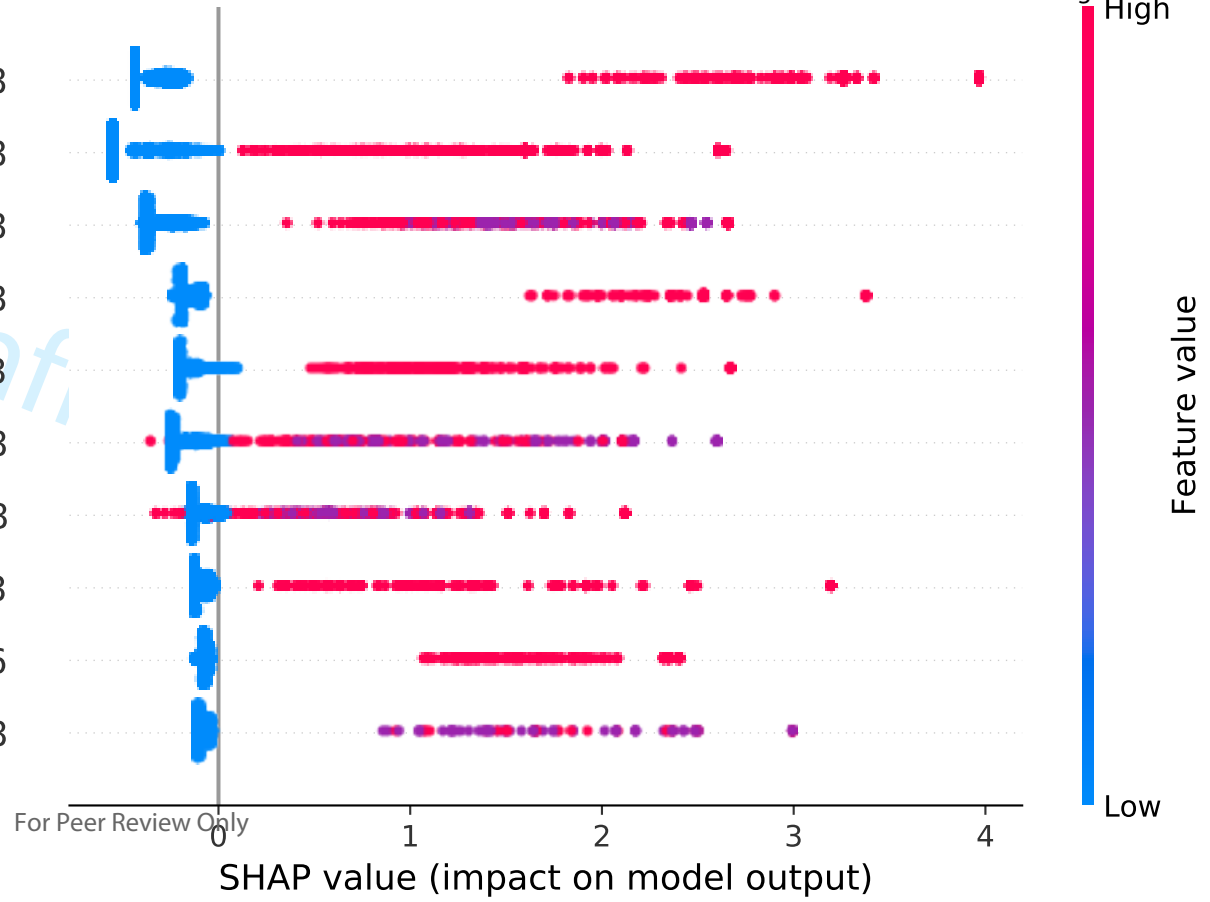

Supplement: open-2021-0170-original-submission.pdf [file open-2021-0170-original-submission.pdf]
